# Supplementary material for: The Histone Marks Signature in Exonic and Intronic Regions Is Relevant in Early Response of Tomato Genes to Botrytis cinerea and in miRNA Regulation
Source: Plants (Basel). 2020 Mar 1;9(3):300. doi: 10.3390/plants9030300 (PMC7154849; doi:10.3390/plants9030300)
Supplement: Supplementary file 1 [file plants-09-00300-s001.xlsx]

## Sheet: 1 ChIP B. cinerea
	Gene	Region	Condition	Replicate 1									Replicate 2									Replicate 3
				H3K9ac (% H3)			H3K4me3 (% H3)1			RNAPII (% INPUT)			H3K9ac (% H3)			H3K4me3 (% H3)1			RNAPII (% INPUT)			H3K9ac (% H3)			H3K4me3 (% H3)1			RNAPII (% INPUT)
				Mean	Standard deviation	Significance	Mean	Standard deviation	Significance	Mean	Standard deviation	Significance	Mean	Standard deviation	Significance	Mean	Standard deviation	Significance	Mean	Standard deviation	Significance	Mean	Standard deviation	Significance	Mean	Standard deviation	Significance	Mean	Standard deviation	Significance
	DES	Promoter	Control	0.0022745	0.000274259	1.88344e-05	0.00758504	0.000361608	9.92099e-05	4.48231e-05	1.12548e-06	1.03134e-05	0.0278907	0.000731683	4.20568e-05	0.0494789	0.0065839	0.000756442	0.000651779	1.35449e-05	0.000122503	0.0116511	0.00311802	0.00124021	0.0764503	0.00611065	0.00810734	0.000134284	1.47802e-05	0.0011065
			Infected	0.0755797	0.00535318		0.0659069	0.00647556		0.00666078	0.00041583		0.126978	0.00883979	0	0.15712	0.0121191	0	0.00296187	0.000270669	0	0.111483	0.00931985	0	0.129238	0.0125754	0	0.000754746	0.000127304	0
		TSS	Control	0.000818729	3.41588e-05	0.000109929	0.00694165	0.00263374	6.55292e-05	0.000135127	8.17478e-05	0.000289475	0.0180034	0.00162078	0.00274162	0.0437348	0.00313343	0.00226313	0.00133982	0.000115974	0.00726567	0.0109488	0.00132834	0.012178	0.0699372	0.00384226	0.00121262	0.000213506	1.45355e-05	0.00282499
			Infected	0.027634	0.00306037		0.0917327	0.000969542		0.00681219	0.000295972		0.0987814	0.00843538	0	0.127361	0.0206323	0	0.00393684	0.000458358	0	0.0824611	0.0284576	0	0.340367	0.0194505	0	0.00177195	0.000412484	0
		Exon 2 (end of CDS)	Control	0.00168273	0.000160722	3.0633e-05	0.0103289	0.000855283	7.09152e-05	0.000387332	5.73903e-05	0.000278604	0.0201484	0.00279047	1.55034e-05	0.0883254	0.00505993	0.000129315	0.00156265	0.000358717	0.001563	0.0235947	0.00219912	0.00127239	0.113599	0.00543956	0.00382359	0.000626066	3.76939e-05	0.000558122
			Infected	0.0304554	0.00237245		0.115894	0.0107488		0.0179568	0.00254038		0.0819526	0.00312342	0	0.17775	0.00719464	0	0.00641269	0.000680145	0	0.121395	0.0208389	0	0.347912	0.0285453	0	0.0046328	0.000691719	0
	DOX1	Promoter	Control	0.00123771	6.64888e-05	3.01378e-05	0.00637608	0.000772665	0.000195622	3.36426e-05	2.64004e-05	0.0059703	0.0265671	0.00274843	0.0094894	0.0586694	0.0105475	0.00974492	0.000793814	7.14574e-05	0.0043465	0.0295165	0.00447792	0.000440119	0.0734193	0.0155215	0.00364202	9.14837e-05	1.1659e-05	2.95228e-05
			Infected	0.023512	0.00183209		0.0869959	0.0106253		0.00066704	0.000102794		0.0507825	0.00597707	0	0.103261	0.0124747	0	0.0014527	0.000132273	0	0.0777074	0.00570804	0	0.146645	0.0127482	0	0.000312283	8.13683e-06	0
		TSS	Control	0.00204145	0.000259833	4.68648e-05	0.0124745	0.0016724	4.12569e-05	0.000270539	0.000220506	0.0012097	0.0345783	0.00226466	0.00239318	0.0524025	0.000545251	0.000238186	0.00115976	3.53228e-05	0.0102827	0.0334392	0.00409291	0.000361517	0.11172	0.0031403	0.000201482	0.000151576	1.34452e-05	8.01862e-06
			Infected	0.0334269	0.0028756		0.121358	0.00369639		0.00191482	0.00025708		0.0796507	0.00594927	0	0.189316	0.0190161	0	0.00166527	0.000111651	0	0.0879153	0.00584449	0	0.321028	0.0093211	0	0.000568861	1.70438e-05	0
		Exon 1 (start of CDS)	Control	0.00547456	0.000233332	0.000153898	0.0155665	0.00155004	0.000315255	2.65929e-05	3.70311e-05	0.016844	0.0446948	0.00313805	0.0272309	0.0936904	0.00778678	0.00318576	0.00027883	5.59884e-05	0.00986972	0.0322437	0.00619327	0.00139864	0.122625	0.006654	0.00184333	0.000182371	5.67718e-05	0.586002
			Infected	0.0602294	0.00680285		0.132949	0.0174537		0.000683008	0.000285578		0.0758623	0.0104387	0	0.194014	0.016691	0	0.000648977	9.97509e-05	0	0.130437	0.0126107	0	0.369192	0.0243516	0	0.000201909	7.09651e-06	0
		Exon 10 (end of CDS)	Control	0.00316984	0.000297599	0.00235423	0.00574728	0.000419282	2.66936e-05	3.38285e-05	4.74939e-05	0.00030006	0.00443775	0.000329699	0.00501921	0.0369297	0.00230805	0.00177281	0.0027389	0.000208609	0.0126765	0.00873138	0.000302779	0.00235665	0.065161	0.00477075	0.00211375	0.000702839	4.62087e-05	7.27198e-06
			Infected	0.013761	0.00114125		0.0671922	0.00488708		0.00255154	0.000368057		0.0122377	0.00119923	0	0.079992	0.00543539	0	0.00369114	4.44671e-05	0	0.0235952	0.00147328	0	0.162633	0.012359	0	0.00151229	6.059e-06	0
	LOXD	Promoter	Control	0.0156946	0.00110982	0.000560398	0.0236095	0.00210388	0.0023464	0.000366477	3.05537e-05	7.23889e-05	0.070028	0.00842466	0.193761	0.109131	0.000871337	0.0212881	0.000932508	6.21759e-05	8.18088e-05	0.0387745	0.00359216	0.00122994	0.106571	0.00740005	0.00973792	0.000192319	3.52456e-05	0.0233293
			Infected	0.0497134	0.00270679		0.0556904	0.00467205		0.0024314	0.000209805		0.0807127	0.00835133	0	0.126557	0.00477982	0	0.00220572	8.93504e-05	0	0.156604	0.0247632	0	0.237957	0.048489	0	0.000600743	0.000125617	0
		TSS	Control	0.0278676	0.000876041	0.000250463	0.040604	0.00394896	0.00057871	0.00121945	5.40165e-05	0.00225517	0.0969868	0.0144894	0.89914	0.164138	0.0178267	0.0276095	0.00147921	0.000230422	0.000369715	0.0751465	0.00449292	0.000457029	0.184003	0.0216509	0.00130996	0.000289533	1.40558e-05	0.000367863
			Infected	0.0712612	0.00604421		0.100935	0.00666547		0.0047725	0.000326834		0.0956215	0.00954365	0	0.109423	0.0044876	0	0.00445193	0.000108234	0	0.226062	0.0110405	0	0.429917	0.0356316	0	0.00110634	4.43357e-05	0
		Exon 1	Control	0.0294611	0.00304698	0.0371889	0.0513949	0.00269742	0.0144424	0.00398288	0.000406752	0.000993315	0.0637393	0.00596944	0.0202238	0.176967	0.016051	0.0120513	0.00231928	0.000519239	0.0020392	0.0706889	0.00827274	4.81864e-05	0.202328	0.0243657	0.00119981	0.000754509	6.69084e-05	0.00512542
			Infected	0.0675858	0.014037		0.102256	0.0119731		0.00936068	0.000696749		0.143962	0.0227757	0	0.123664	0.0111819	0	0.00542325	0.000543645	0	0.198545	0.006337	0	0.425395	0.0339987	0	0.00168801	0.000169616	0
		Exon 8 (3'-UTR)	Control	0.00300162	0.000184466	0.00498138	0.00540647	0.000688729	0.0937458	0.00096788	0.000209894	0.00238518	0.00807093	0.000941485	0.00182823	0.0328226	0.000604951	6.8405e-06	0.0044488	0.000590307	0.0158854	0.0122981	0.000908893	0.00350137	0.0491924	0.00428499	0.0011919	0.000701618	5.10926e-05	0.00157464
			Infected	0.00741071	0.000674388		0.00453305	5.52264e-05		0.00622022	0.00131259		0.0262793	0.00228081	0	0.0136222	0.000757734	0	0.00581939	2.3301e-05	0	0.0224939	0.00182256	0	0.0288456	5.76844e-05	0	0.00206484	0.000145027	0
	EF1a	Exon 2	Control	0.00725598	0.000890699	0.0931176	0.0234378	0.00244377	0.00741128	0.00147443	7.66328e-05	0.00374447	0.00517656	0.000546489	0.106919	0.0491012	0.00612276	0.0252363	0.00059589	2.37354e-05	0.340132	0.00581254	0.000810777	0.0257251	0.0660503	0.00425886	0.00154327	0.000160673	4.02614e-06	0.670075
			Infected	0.00577432	0.000246248		0.0118667	0.000974489		0.000880946	1.85996e-05		0.00603325	0.000120017	0	0.0292602	0.00143736	0	0.00056255	4.52612e-05	0	0.00798484	0.000424735	0	0.040409	0.0032366	0	0.000157088	1.22469e-05	0
	miR1127-3p	Promoter	Control	0.00368838	0.000243743	0.00579822	0.00702046	7.45565e-05	0.000374275	0.000645284	2.5934e-05	3.12977e-05	0.00561268	0.000601679	0.01279	0.023147	0.00327586	0.00635953	0.000131454	4.85538e-05	0.0581327	0.0105587	0.00214686	0.0210638	0.0440053	0.000927178	0.00070941
			Infected	0.00907958	0.000884239		0.00209578	0.000254225		0.000202858	2.04947e-05		0.00768267	0.000322015	0	0.0131648	0.000417549	0	5.71274e-05	6.08171e-06	0	0.0182261	0.000470479	0	0.0181269	0.00225598	0			0
		TSS	Control	0.00481793	0.00199096	0.106922	0.00500496	0.000523369	0.00586393	0.000195668	1.56165e-05	0.0422932	0.00488578	0.000385069	0.0010103	0.0268606	0.00407499	0.00967389	0.000126767	1.87834e-05	0.0132404	0.00674653	0.000779359	0.00049349	0.0536456	0.00799243	0.0115232
			Infected	0.00241956	0.000231346		0.00241956	0.000231346		0.000229666	9.66026e-06		0.00860676	0.000539308	0	0.00957019	0.00164139	0	4.33944e-05	2.59123e-05	0	0.0136039	0.000834135	0	0.0262165	0.00493645	0			0
		3' gene region and intergenic	Control	0.00136336	0.000146544	0.00360356	0.00237707	0.000287335	0.0464703	0.00186344	7.1027e-05	2.75546e-05	0.00496597	0.00123455	0.094444	0.0143728	0.00114971	0.0876507				0.00696272	0.000625541	0.0183127	0.032359	0.00193072	0.00720742
			Infected	0.00306362	0.000302261		0.00306362	0.000302261		0.000640385	5.98584e-05		0.00719951	0.00127094	0	0.0124918	0.00077227	0			0	0.0109581	0.00128737	0	0.022038	0.00266127	0			0
	WRKY75	TSS	Control	0.00798079	0.000431665	0.000390007	0.0276368	0.00369958	0.000801393	0.00028352	0.000446361	0.000609359	0.0656173	0.00497019	0.000798308	0.126582	0.011366	0.0135164	0.000727543	4.5505e-05	0.00099513	0.116019	0.00963047	0.00671272	0.323953	0.0165115	0.00149064	0.000189942	3.41427e-05	0.00755885
			Infected	0.0934273	0.0134637		0.133284	0.00935235		0.00418469	0.000507389		0.173024	0.010774	0	0.214736	0.0248323	0	0.0016077	9.69076e-05	0	0.331366	0.0369935	0	0.423622	0.0137686	0	0.000828536	0.000119263	0
		Exon 1	Control	0.0102673	0.00156119	0.00177955	0.0215602	0.00116979	0.000365317	0.000406363	6.42595e-05	5.02594e-05	0.101207	0.0126414	0.000765745	0.108305	0.017773	0.0139264	0.00126604	7.69139e-05	0.0111169	0.159592	0.00879229	0.0222273	0.0520546	0.00330803	0.00893464	0.000431715	4.32209e-05	0.0100501
			Infected	0.0672247	0.00559505		0.15471	0.0206083		0.00371774	0.000132495		0.199952	0.0134336	0	0.234307	0.0366169	0	0.00204423	0.000193032	0	0.191511	0.0116881	0	0.141282	0.0164015	0	0.000907817	0.000112011	0
		Intron (binding region)	Control	0.0272961	0.00945949	0.025182	0.260455	0.118748	0.492454	0.000334793	0.000131131	0.000207491	0.0633356	0.003815	0.000820531	0.145083	0.0132572	0.695792	0.00079455	4.40134e-05	0.00180658	0.0706071	0.00430675	0.000728252	0.257351	0.0107197	0.00725711	0.000157219	5.58831e-06	3.81938e-07
			Infected	0.13694	0.0347207		0.327421	0.096606		0.00802658	0.00036656		0.149564	0.00852112	0	0.14883	0.00726844	0	0.00250086	0.000398605	0	0.244629	0.0319438	0	0.543753	0.0486875	0	0.00179021	4.45969e-05	0
		Intrón (region 1)	Control	0.0147069	0.00192441	0.000227786	0.154175	0.0121581	0.000867841	0.000733744	0.000164101	0.000523302	0.0557595	0.00557812	0.0181787	0.163558	0.00510234	0.0751368	0.0037466	0.000718132	0.00141264	0.0318442	0.00384013	0.000219224	0.141753	0.00524448	0.000143288	0.000311703	1.17151e-05	1.63054e-05
			Infected	0.154664	0.0191299		0.551717	0.0337702		0.0110298	0.00059183		0.109041	0.0156058	0	0.254726	0.0658618	0	0.00846179	0.000747581	0	0.263675	0.031303	0	0.706318	0.0687211	0	0.00201971	0.000119875	0
		Intrón (region 2)	Control	0.011551	0.000661769	0.000781402	0.0801446	0.00856792	0.0015256	0.00119366	0.000207339	0.00148345	0.0375971	0.00285867	0.0168168	0.100228	0.00347295	0.00464989	0.000820208	3.52102e-05	0.0049178	0.024914	0.00282546	0.000169973	0.110533	0.00650986	0.000377621	0.00024514	2.06194e-05	4.59265e-07
			Infected	0.108157	0.0182119		0.416442	0.0308302		0.00713837	0.000605943		0.107313	0.0168939	0	0.240408	0.0186351	0	0.00230358	0.000200183	0	0.207709	0.0231338	0	0.680613	0.0888932	0	0.00125808	1.76138e-05	0
		Intrón (region 3)	Control	0.00771035	0.00133386	0.0100824	0.0281716	0.00263944	0.00510993	0.000614918	4.89993e-05	0.000448448	0.0200901	0.00271427	0.0150197	0.0567134	0.00918008	0.000109846	0.00118399	0.000137302	0.000604988	0.0164626	0.000513204	0.000584495	0.0697419	0.00276985	0.00129204	0.000319512	8.05459e-05	7.9376e-05
			Infected	0.0612667	0.0201515		0.287322	0.0806289		0.00824324	0.0012456		0.0514775	0.00826179	0	0.195088	0.011393	0	0.00268715	0.000189492	0	0.112487	0.0167936	0	0.563745	0.106236	0	0.00245018	0.000131623	0
		Exon 2 (3'-UTR)	Control	0.00231328	0.000142088	0.000155762	0.00256536	0.00038998	2.13398e-05	0.000230695	0.000139765	0.00474346	0.01006	0.00052442	0.00128592	0.0627969	0.0118287	0.0359217	0.00112802	1.56539e-05	8.11573e-07	0.0134475	0.000891083	0.123013	0.0396995	0.00211278	0.00208759	0.000614837	0.000152917	0.0792974
			Infected	0.025438	0.00288005		0.0803672	0.00585759		0.00418574	0.000570155		0.036089	0.00556785	0	0.0905312	0.0064227	0	0.00708979	0.000197532	0	0.060748	0.0420128	0	0.188913	0.0131533		0.00150491	0.000497332	0

## Sheet: 2 Gene expression
	Pathogen		B. cinerea1						P. syringae
	Genes	Statistics	Replicate 1		Replicate 2		Replicate 3		Replicate 1		Replicate 2		Replicate 3
			Control	Infected	Control	Infected	Control	Infected	Control	Infected	Control	Infected	Control	Infected
	DES	Mean	0.00279717	3.47677	0.594785	17.2687	0.281966	19.6572	0.00497648	0.0187779	0.000782567	0.0926876	0.00345626	0.0264291
		Standard deviation	0.000128009	0.178082	0.070515	0.419611	0.0073469	0.727258	0.000103477	0.00123947	4.60869e-05	0.00269108	9.71371e-05	0.00166988
		Significance	4.57673e-06	29.0336	0.000145409	69.7149	1.31948e-06		4.31909e-05		4.89426e-07		1.85191e-05
	DOX2	Mean	0.00716149	3.25628	0.568047	9.81571	0.248344	8.75479	0.00405185	0.0267777	0.00120675	0.244331	0.00763511	0.05172
		Standard deviation	0.000260274	0.0468373	0.0104633	0.629391	0.00784828	0.254186	0.000105575	0.0010762	0.000122941	0.01604	0.000241288	0.00161356
		Significance	2.87767e-08	17.2798	1.41659e-05	35.2526	5.31479e-07		3.40039e-06		1.25106e-05		1.24676e-06
	LOXD	Mean	0.00977868	0.1413	0.0101764	0.0579643	0.00778245	0.0813989	0.00855067	0.034489	0.00186323	0.0356117	0.00666014	0.0234609
		Standard deviation	6.77803e-05	0.00392575	0.00040899	0.00322432	0.00115299	0.00450812	0.000416155	0.00248288	0.000106022	0.000994132	7.06329e-05	9.37792e-05
		Significance	5.28462e-07	5.69595	1.41189e-05	10.4593	0.000671723		0.00243694		5.12444e-07		5.6099e-09
	WRKY75	Mean	0.00931445	0.301523	0.136386	3.53605	0.0900456	5.46743	0.00246831	0.110306	0.00181917	0.118778	0.00131766	0.0423492
		Standard deviation	0.000934981	0.0323483	0.110637	0.72582	0.0131223	0.529939	0.000213663	0.0110724	4.74002e-05	0.00680183	0.000147434	0.00278361
		Significance	9.76167e-05	25.9268	0.00131132	60.7184	6.16226e-05		7.24467e-05		7.56937e-06		1.40559e-05

## Sheet: 3 Ratio comparisions
	Gene	Region	Comparision	Antibodies												Gene/5' region												B. cinerea/P. syringae
			Pathogen	B. cinerea						P. syringae						B. cinerea						P. syringae						B. cinerea and P. syringae
			Analysis	H3K9ac/RNAPII		H3K9ac/H3K4me3		H3K4me3/RNAPII		H3K9ac/RNAPII		H3K9ac/H3K4me3		H3K4me3/RNAPII		RNAPII		H3K4me3		H3K9ac		RNAPII		H3K4me3		H3K9ac		RNAPII		H3K4me3		H3K9ac
			Statistics	Significance	Ratio	Significance	Ratio	Significance	Ratio	Significance	Ratio	Significance	Ratio	Significance	Ratio	Significance	Ratio	Significance	Ratio	Significance	Ratio	Significance	Ratio	Significance	Ratio	Significance	Ratio	Significance	Ratio	Significance	Ratio	Significance	Ratio
	DES	Promoter	Control	0.312523	1	0.0243116	1	0.0571777	1	0.234049	1	0.0944286	1	0.43883	1													0.0489316	1	0.0347778	1	0.0376986	1
			Infected		0.298238		3.49319		0.0853772		2.05928		2.54554		0.808975														11.3355		3.23357		3.99191
		TSS	Control	0.448331	1	0.00504491	1	0.0900924	1	0.40496	1	0.210838	1	0.190967	1	0.213596	1	0.117051	1	0.462581	1	0.0765701	1	0.104711	1	0.401189	1	0.0684053	1	0.02242	1	0.0321002	1
			Infected		0.758638		2.22784		0.340526		1.1772		1.69638		0.69395		0.686762		1.58942		0.9877		2.09418		1.37569		1.03744		4.67575		3.59857		4.1426
		Exon 2 (end of CDS)	Control	0.0911426	1	0.000611971	1	0.00458689	1	0.410118	1	0.0954637	1	0.143976	1	0.242955	1	0.346654	1	0.0277932	1	0.000427817	1	0.249893	1	0.117235	1	0.080395	1	0.0439941	1	0.0337602	1
			Infected		0.471992		1.67601		0.281616		0.714176		1.77717		0.401862		0.7185		1.14028		0.639601		2.48883		1.11523		0.865313		3.5069		3.196		3.16997
	DOX1	Promoter	Control	0.196386	1	0.0189995	1	0.0483728	1	0.360178	1	0.390221	1	0.32527	1													0.12226	1	0.187991	1	0.263927	1
			Infected		0.938962		1.35279		0.694094		1.47746		1.48205		0.996901														2.64453		1.93359		1.64187
		TSS	Control	0.209195	1	0.491932	1	0.199065	1	0.439592	1	0.254205	1	0.401088	1	0.152044	1	0.234537	1	0.452916	1	0.219088	1	0.400254	1	0.220228	1	0.480486	1	0.0326377	1	0.238862	1
			Infected		1.73697		1.31403		1.32186		0.858561		1.55625		0.551687		0.675287		1.28171		1.01229		1.34271		0.952662		1.10908		1.02444		2.56898		1.64072
		Exon 1 (start of CDS)	Control	0.474373	1	0.251031	1	0.455352	1	0.0809674	1	0.161007	1	0.0281219	1	0.336172	1	0.45026	1	0.397426	1	0.133859	1	0.492294	1	0.0163375	1	0.11567	1	0.0835688	1	0.359489	1
			Infected		0.575043		1.22919		0.467821		3.23263		1.86379		1.73444		0.811475		1.03544		0.924518		0.660598		0.996257		1.31562		3.81058		2.04338		1.23191
		Exon 10 (end of CDS)	Control	0.299625	1	0.297269	1	0.300877	1	0.365083	1	0.00798342	1	0.18774	1	0.379108	1	0.248596	1	0.279076	1	0.464783	1	0.00172816	1	0.330427	1	0.219844	1	0.0242465	1	0.0150355	1
			Infected		0.124183		0.599349		0.207197		0.943935		2.18596		0.431817		1.2087		1.09633		0.696867		0.961903		0.477712		0.841009		2.97206		4.55036		1.66513
	LOXD	Promoter	Control	0.145064	1	0.0822309	1	0.0131501	1	0.0612144	1	0.359447	1	0.0380119	1													0.00530038	1	0.235597	1	0.491701	1
			Infected		0.68948		1.45339		0.474394		2.67989		1.10959		2.41521														4.03382		0.834195		1.00853
		TSS	Control	0.0450185	1	0.0507384	1	0.0384007	1	0.196575	1	0.49037	1	0.195646	1	0.45741	1	0.245737	1	0.00262618	1	0.0658358	1	0.207501	1	0.113694	1	0.00873833	1	0.412358	1	0.448449	1
			Infected		0.609743		1.19355		0.510864		0.803961		1.18621		0.677756		0.971938		0.859038		0.801226		2.84365		0.808105		0.713411		1.3873		0.903602		0.953113
		Exon 1	Control	0.273861	1	0.0858924	1	0.1303	1	0.272334	1	0.330137	1	0.0505994	1	0.101401	1	0.0706554	1	0.495162	1	0.125684	1	0.272168	1	0.200942	1	1.62101e-05	1	0.124492	1	0.202025	1
			Infected		1.0629		1.53653		0.691751		1.36899		0.986718		1.38742		0.630643		0.782208		0.995639		1.92523		1.12292		0.817068		1.38169		0.616947		1.06763
		Exon 8 (3'-UTR)	Control	0.386152	1	0.00544874	1	0.00168878	1	0.38665	1	0.0634913	1	0.00364022	1	0.139775	1	0.000187225	1	0.49935	1	0.00788752	1	0.0576617	1	0.472356	1	0.48013	1	0.150275	1	0.470704	1
			Infected		0.707457		4.10576		0.172308		0.850349		3.22724		0.263491		0.796178		0.322068		0.999059		3.17604		0.309234		0.994309		1.02466		0.785703		1.01311
	miR1127-3p	Promoter	Control	ns	ns	0.00719784	1	ns	ns	0.166816	1	0.0813436	1	0.245719	1													ns	ns	0.0386593	1	0.0437938	1
			Infected		ns		4.34385		ns		2.58975		1.91482		1.35248														ns		0.644102		1.46827
		TSS	Control	ns	ns	0.0538563	1	ns	ns	0.164298	1	0.00782987	1	0.414726	1	ns	ns	0.417986	1	0.273158	1	0.33296	1	0.266251	1	0.468919	1	ns	ns	0.0271892	1	0.497181	1
			Infected		ns		3.22204		ns		1.85555		2.10031		0.883463		ns		1.06371		0.674378		1.12219		0.865042		1.03074		ns		0.756445		0.996678
		3' gene region and intergenic	Control	ns	ns	0.00169942	1	ns	ns	0.0910505	1	0.0155954	1	0.435799	1	ns	ns	0.0377555	1	0.222851	1	0.164419	1	0.365637	1	0.130493	1	ns	ns	0.0668167	1	0.0558534	1
			Infected		ns		1.85654		ns		2.40253		2.03487		1.18068		ns		2.21775		0.95883		1.31491		0.93547		1.15785		ns		1.41755		1.31465
	WRKY75	TSS	Control	0.209204	1	0.00319678	1	0.0226432	1	0.39534	1	0.099334	1	0.160628	1													0.437011	1	0.27425	1	0.0644828	1
			Infected		0.806293		2.19752		0.36691		1.95525		3.91928		0.49888														0.910407		0.770267		0.396972
		Exon 1	Control	0.182182	1	0.120221	1	0.293861	1	0.345378	1	0.117379	1	0.0276981	1	0.00687906	1	0.0167803	1	0.0128265	1	0.422004	1	0.000102465	1	0.127423	1	0.186567	1	0.456444	1	0.0158375	1
			Infected		0.755707		0.806685		0.936805		2.36212		3.82404		0.617701		0.602159		1.5792		0.560477		1.07498		1.1628		1.11267		0.582445		1.04376		0.195671
		Intron (binding region)	Control	0.027753	1	0.0125761	1	0.0118954	1	0.181098	1	0.0610437	1	0.0399626	1	0.0155673	1	0.217956	1	0.227887	1	0.497994	1	0.27731	1	0.00836675	1	0.171129	1	0.00739349	1	0.00154539	1
			Infected		0.281569		2.46664		0.114151		2.7545		4.09386		0.672836		1.8211		0.633871		0.775039		0.997704		1.12927		1.36037		1.89355		0.413461		0.24943
		Intrón (region 1)	Control	0.326848	1	0.0365268	1	0.0694349	1	0.240907	1	0.129516	1	0.199644	1	0.155258	1	0.284691	1	0.316864	1	0.2981	1	0.0195805	1	0.00242703	1	0.453249	1	0.0797017	1	0.0503954	1
			Infected		0.873026		2.05088		0.425684		2.61843		3.0768		0.851024		1.15636		1.37431		1.24536		1.28466		1.80455		1.53492		0.933717		0.550383		0.327417
		Intrón (region 2)	Control	0.0516899	1	0.0221086	1	0.371925	1	0.0612533	1	0.0735515	1	0.469396	1	0.337078	1	0.110415	1	0.236747	1	0.484978	1	0.0857813	1	0.0821997	1	0.281689	1	0.170852	1	0.0531905	1
			Infected		1.47654		1.49464		0.987891		2.60337		2.28853		1.13757		0.846171		1.9286		1.36212		1.01684		1.76659		1.62428		0.864888		0.731419		0.455941
		Intrón (region 3)	Control	0.205766	1	0.00151868	1	0.3801	1	0.425768	1	0.0566263	1	0.0682565	1	0.230895	1	0.0200656	1	0.352844	1	0.0216641	1	0.000776164	1	0.203382	1	0.239189	1	0.167347	1	0.0419073	1
			Infected		0.742874		0.79832		0.930546		1.25948		2.55311		0.493313		1.17925		2.98165		1.16421		1.73915		1.61577		1.43014		0.663936		1.43634		0.443696
		Exon 2 (3'-UTR)	Control	0.357524	1	0.458693	1	0.453032	1	0.191888	1	0.104497	1	0.00703045	1	0.328358	1	0.0868334	1	0.102139	1	0.0339843	1	0.302563	1	0.341393	1	0.215064	1	0.223703	1	0.126799	1
			Infected		0.710693		0.508986		1.39629		0.817202		3.14789		0.259603		1.25188		2.71841		1.26437		2.12034		0.961286		0.855198		0.602128		2.12586		0.63445

## Sheet: 4 P. syringae quantitation
	Replicate	Measuring		Control	Infected
	1	cDNA		3.43404e-05	0.0330139
		DNA	Direct	0.000676757	0.782389
			INPUT 0	0.000741316	0.27423
	2	cDNA		4.42474e-05	0.00974055
		DNA	Direct	0.000807071	0.128278
			INPUT 0	0.000834409	0.0601839
	3	cDNA		1.27456e-05	0.00285496
		DNA	Direct	0.000424583	0.127671
			INPUT 0	0.0015843	0.0828736

## Sheet: 5 ChIP P. syringae
	Gene	Region	Condition	Replicate 1									Replicate 2									Replicate 3
				H3K9ac			H3K4me3			RNAPII			H3K9ac			H3K4me3			RNAPII			H3K9ac			H3K4me3			RNAPII
				Mean	Standard deviation	Significance	Mean	Standard deviation	Significance	Mean	Standard deviation	Significance	Mean	Standard deviation	Significance	Mean	Standard deviation	Significance	Mean	Standard deviation	Significance	Mean	Standard deviation	Significance	Mean	Standard deviation	Significance	Mean	Standard deviation	Significance
	DES	Promoter	Control	0.00106926	7.18198e-05	0.000119458	0.0119628	0.000254238	0.303294	0.000770854	0.000104259	0.00955086	0.00198844	7.72845e-05	0.00849336	0.0109346	0.000458453	0.00357124	0.00143293	0.000112539	7.01938e-05	0.00700768	0.000337395	0.568564	0.031746	0.00232655	0.462634	0.00431963	0.00026998	0.0158147
			Infected	0.00543995	0.000504392		0.0121836	0.000195894		0.000211981	1.91466e-05		0.00468172	0.000963763	0	0.0137045	0.000197076	0	0.00301511	0.000115185	0	0.00742264	0.00104151	0	0.0339019	0.00385215	0	0.0075556	0.000859704	0
		TSS	Control	0.00104777	0.000119474	6.32704e-06	0.0127027	0.000284726	0.000838497	0.000551748	6.67655e-05	0.0514858	0.00182927	0.000111455	0.0108237	0.0128214	0.00044894	0.0116943	0.00138739	0.000274094	0.000272308	0.117992	0.0122102	0.0381824	0.507831	0.0791855	0.000740543	0.181273	0.0050495	0.00391162
			Infected	0.00464394	8.12169e-05		0.0147234	0.000256482		0.000714095	7.65719e-05		0.00405717	0.000464908	0	0.0174513	0.00115958	0	0.00494428	0.000364689	0	0.170042	0.0227007	0	1.14238	0.0501797	0	0.365326	0.0233901	0
		Exon 2 (end of CDS)	Control	0.00109019	0.000114265	0.00148461	0.0132566	0.000808625	0.0332447	0.00101414	0.000100125	0.0615257	0.00186547	7.26145e-05	0.00258242	0.0123971	0.000824964	0.0232074	0.00182593	9.8427e-05	5.96502e-06	0.00638891	0.000977978	0.845454	0.0374928	0.00195092	0.229704	0.00449322	0.000201082	0.000171679
			Infected	0.00390315	0.000304605		0.0156553	0.000990561		0.000821546	4.57222e-05		0.00418551	0.000265669	0	0.0218778	0.00291443	0	0.00796482	0.000165639	0	0.00653826	0.000761477	0	0.0340143	0.00354025	0	0.01984	0.000619082	0
	DOX1	Promoter	Control	0.00108644	7.8284e-05	0.000392198	0.00925885	0.000357122	0.0033086	0.0005758	0.00033899	0.278013	0.00255995	0.000136259	0.00353509	0.00767584	0.000271306	0.000772057	0.00135159	3.98527e-05	0.000144339	0.00150466	8.05034e-05	0.260873	0.00325564	0.000200074	0.0184315	0.000479867	5.86583e-05	0.016348
			Infected	0.00533923	0.000241334		0.0125336	0.000619479		0.000329025	3.46515e-05		0.00655146	0.000517226	0	0.0143603	0.000627496	0	0.00317538	9.22008e-05	0	0.00132565	0.000201671	0	0.00785491	0.0011673	0	0.00131194	0.000216005	0
		TSS	Control	0.00173198	5.47293e-05	5.76228e-05	0.0135904	0.000593634	0.0182054	0.00133674	0.0002621	0.0543308	0.00298879	0.000278685	0.0130505	0.00795891	0.00108758	0.00254854	0.000660753	6.05089e-05	0.000168104	0.0037098	0.000353323	0.0451841	0.0128956	0.000934696	0.00531126	0.000232108	7.05729e-05	0.00141428
			Infected	0.00767022	0.00057294		0.0168204	0.00107416		0.000807335	0.000204723		0.00845052	0.00122801	0	0.0197228	0.00198749	0	0.00134733	6.26786e-05	0	0.00447872	0.000286667	0	0.0222128	0.00191108	0	0.00167453	0.000166818	0
		Exon 1 (start of CDS)	Control	0.00143686	0.000139207	0.00201622	0.0133343	0.000231338	0.000246885	0.000446658	1.44295e-05	0.0061755	0.00339156	5.78197e-05	0.000525449	0.00976247	0.00161362	0.0337793	0.00120266	0.000199383	0.818916	0.00384602	0.000391062	0.0376706	0.0158937	0.00112121	8.19251e-05	0.00113262	3.14649e-05	0.000805172
			Infected	0.00810573	0.000629561		0.0216116	0.000522663		0.00031833	2.83115e-05		0.0111792	0.000356597	0	0.0218082	0.0045942	0	0.00123728	0.000139721	0	0.00521895	0.000604988	0	0.0265231	0.000104749	0	0.00163445	5.77783e-05	0
		Exon 10 (end of CDS)	Control	0.000711514	2.59478e-05	3.51084e-05	0.0118237	0.000163974	0.0446796	0.000608458	1.50357e-05	0.0165182	0.00116005	4.58435e-05	0.00536853	0.00650046	0.000808364	0.308923	0.00062886	9.94918e-05	0.00143694	0.00187735	1.98886e-05	0.00312127	0.0114855	0.00112218	0.501734	0.00103418	0.000125929	0.084799
			Infected	0.00173378	4.53447e-05		0.00941274	0.000951995		0.000388555	5.69739e-05		0.0020966	0.000291975	0	0.00579496	0.000659548	0	0.00266344	0.000236066	0	0.00280977	0.000252897	0	0.0107806	0.00121577	0	0.00124906	9.9591e-05	0
	LOXD	Promoter	Control	0.00843293	0.000660995	0.00160708	0.0238031	0.00265721	0.0001488	0.0120952	0.00111669	0.00614604	0.0109662	0.00147284	0.00118318	0.0106682	0.000910829	8.67304e-05	0.052447	0.0020825	0.0233733	0.0145237	0.000683827	0.0111096	0.0476629	0.00328236	0.14688	0.0206635	0.000613428	0.0894801
			Infected	0.0300775	0.00214389		0.0453618	2.45869e-07		0.00552183	0.000316203		0.0219638	0.00170851	0	0.0360756	0.00154705	0	0.0621186	0.00355735	0	0.0250491	0.00234332	0	0.0613181	0.010633	0	0.0223354	0.00103936	0
		TSS	Control	0.0114671	0.00126439	4.04391e-06	0.0373973	0.00182029	0.0111608	0.0122849	0.000727701	7.92701e-07	0.0165203	0.00167574	0.255589	0.026398	0.00282468	0.0225843	0.102404	0.00955	0.022605	0.0357745	0.00304693	0.23873	0.118204	0.00154548	0.977699	0.0153586	0.00267288	0.0282174
			Infected	0.0466532	0.00117113		0.088055	0.010145		0.0433288	0.000623275		0.0197844	0.00360702	0	0.0490897	0.0074165	0	0.138953	0.0134961	0	0.0328465	0.00171976	0	0.118112	0.00492668	0	0.0431306	0.00935649	0
		Exon 1	Control	0.0122674	0.00207446	1.62182e-05	0.0411435	0.00442114	5.66579e-05	0.0229725	0.00122575	0.0125853	0.022681	0.0026604	0.376401	0.0280363	0.00256526	3.88655e-05	0.118317	0.00492014	0.000476193	0.0308014	0.00316491	0.0243228	0.0971019	0.00757037	0.0150017	0.0512744	0.00583708	0.0317267
			Infected	0.0537354	0.00205462		0.105759	0.00439751		0.0536826	0.00655594		0.0267892	0.00620103	0	0.0750011	0.00170932	0	0.165187	0.00572337	0	0.0400101	0.00323098	0	0.165768	0.0191621	0	0.065548	0.00462667	0
		Exon 8 (3'-UTR)	Control	0.00127919	5.24589e-05	3.82509e-07	0.0162967	0.0018806	0.00358318	0.0120796	0.00178057	0.00103189	0.00191749	0.000188077	0.00822677	0.00881147	0.000140623	0.0219864	0.184897	0.0149404	0.0110503	0.00208603	0.000235154	0.0322804	0.00786957	0.000443405	0.00837842	0.0131389	0.000871896	0.0011373
			Infected	0.00435231	6.02252e-05		0.00438206	0.000741288		0.0241861	0.00167547		0.00443558	0.000528621	0	0.00643202	0.00112381	0	0.39239	0.0472624	0	0.00321006	0.000456169	0	0.00982936	0.000524659	0	0.0578994	0.00344515	0
	EF1a	Exon 2	Control	0.00125358	9.77058e-05	0.0554877	0.0136497	0.00036067	0.0607288	0.00744387	0.00099047	0.00811763	0.0026717	0.000127433	0.00200593	0.0124481	0.000503782	0.188702	0.0139128	0.00134854	0.00740716	0.00123687	6.01968e-05	0.140403	0.00856835	0.000312113	0.313481	0.0228528	0.00383359	0.327977
			Infected	0.0022244	0.000437842		0.0161849	0.00123318		0.00223636	0.000272218		0.00196052	0.000109128	0	0.013001	0.000226388	0	0.00866918	0.000904485	0	0.00107631	0.000124027	0	0.00897791	0.000509964	0	0.0256926	0.0012495	0
	miR1127-3p	Promoter	Control	0.000960925	4.23311e-05	0.000548401	0.004936	0.000446611	0.0683762	0.000485302	0.000228269	0.0462874	0.00264472	6.94742e-05	0.0661022	0.00198608	0.000125575	0.00684824	0.000941917	4.09312e-05	0.0617484	0.00203128	0.000138605	0.00093483	0.00299863	0.000395326	0.0118596	0.000375571	7.7905e-05	0.305022
			Infected	0.00221546	0.00010097		0.00407151	0.000132346		0.000107137	2.50399e-05		0.00228163	0.000189516	0	0.00127195	0.000180408	0	0.000346249	0.000398806	0	0.00102836	9.32303e-05	0	0.00136046	0.000135671	0	0.000311914	4.66715e-05	0
		TSS	Control	0.000943717	6.28728e-05	0.000123495	0.00486202	0.000101302	0.240544	0.000466489	0.000309625	0.181621	0.00384863	0.000382002	0.0092905	0.00305009	0.000105447	4.66794e-05	0.00108166	0.000100283	0.00466404	0.00180149	0.000225168	0.771515	0.00219075	0.000187191	0.00141649	0.000245505	8.99252e-05	0.180927
			Infected	0.00199363	8.5655e-05		0.00437617	0.000513991		0.000111729	6.13e-05		0.00194588	0.000102869	0	0.00110547	6.63016e-05	0	0.000295752	0.000168505	0	0.00185983	0.000234598	0	0.00104187	0.000162077	0	0.000357067	7.77871e-05	0
		3' gene region and intergenic	Control	0.000949957	0.000110027	0.000168429	0.00443092	0.000234006	0.0729438	0.000198068	0.000166493	0.29639	0.00183884	0.000293083	0.804825	0.00219141	0.00031948	0.0817449	0.00150246	0.000435828	0.102783	0.00127816	2.69467e-05	0.000794195	0.00196244	0.000125454	0.000358533	0.00063099	0.000142261	0.1199
			Infected	0.00213992	8.97398e-05		0.00400783	0.000183458		8.25857e-05	8.29531e-06		0.0017616	0.000409256	0	0.00160745	6.31915e-05	0	0.000809409	0.000108157	0	0.000925759	4.39739e-05	0	0.000580331	7.03715e-05	0	0.00043043	6.12558e-05	0
	WRKY75	TSS	Control	0.00256767	0.000146181	8.90267e-08	0.0226365	0.000501445	1.47911e-05	0.00152124	5.27326e-05	0.000422484	0.00622251	0.000616272	0.000743648	0.019978	0.000424558	0.000784722	0.00365135	0.000231203	0.000955352	0.0020127	3.10348e-05	0.00274559	0.00777476	0.000402221	0.0054414	0.00201055	0.000266299	0.000180395
			Infected	0.0668933	0.0012212		0.0807175	0.00396506		0.00433947	0.000163902		0.0332424	0.00195854	0	0.0577155	0.00219957	0	0.0162068	0.000900578	0	0.00450992	0.000655578	0	0.0165386	0.00141381	0	0.0199272	0.00230385	0
		Exon 1	Control	0.00296876	5.17592e-05	1.26173e-05	0.0246856	0.001541	0.000414991	0.0015643	0.000141125	0.00249204	0.00587006	0.000367825	0.000453274	0.0185112	0.000148495	6.1229e-06	0.00300552	0.000140515	7.90664e-05	0.00213232	0.000235383	0.000213128	0.00927971	0.000129723	0.147389	0.00340067	0.000322668	0.00032449
			Infected	0.0869639	0.00555331		0.102637	0.00462477		0.00764072	0.00063361		0.0398837	0.00163625	0	0.0633549	0.000456384	0	0.0176389	0.00152996	0	0.00460249	0.000174509	0	0.0224676	0.0127371	0	0.0184932	0.00224662	0
		Intron (binding region)	Control	0.00195578	0.000119347	1.57904e-07	0.0259013	0.00128188	1.96657e-06	0.00127878	7.32376e-05	0.00173059	0.00542103	0.000480245	5.52058e-05	0.0135772	0.0010708	0.00187031	0.00283044	0.000267013	0.000221946	0.00514666	0.000315881	0.00190467	0.0272841	0.00223192	0.0106144	0.00138424	0.000198471	0.00214062
			Infected	0.0593269	0.00126036		0.0900268	0.00171703		0.00674643	0.000443345		0.0426236	0.00353447	0	0.0644265	0.00469081	0	0.0154513	0.000678444	0	0.0169418	0.00279354	0	0.0522046	0.00593538	0	0.00599018	0.00055809	0
		Intrón (region 1)	Control	0.0010265	0.000125874	1.72028e-05	0.0139009	0.00024295	1.04015e-05	0.0002397	3.33359e-06	3.02158e-05	0.00348948	0.000432458	0.000419489	0.0077995	0.000687557	0.000429612	0.000744042	0.000121297	0.0022344	0.00250287	0.000112717	0.000837717	0.0163631	0.00125353	0.00382104	0.000414278	4.30398e-05	8.92299e-07
			Infected	0.0406721	0.00283086		0.0908326	0.00483961		0.00174754	0.000124139		0.0252094	0.00346198	0	0.0565922	0.00785578	0	0.00478154	0.00043695	0	0.00986089	0.000477977	0	0.0444418	0.00403283	0	0.00235256	3.29182e-05	0
		Intrón (region 2)	Control	0.00126519	0.000168586	0.000300561	0.0136817	0.000474021	0.000137881	0.00131654	0.000137261	0.000119483	0.00198857	8.48276e-05	0.000165046	0.00406492	0.000169108	2.0872e-05	0.00301274	0.000294602	0.00286337	0.00168941	0.000122687	0.00119311	0.0114791	0.00182712	0.00313828	0.00155631	0.000105911	0.00017396
			Infected	0.0307065	0.0043382		0.0689891	0.00666931		0.00701863	0.0002942		0.0203716	0.000494691	0	0.0406061	0.000563319	0	0.0164225	0.00145019	0	0.00908061	0.00155229	0	0.0275323	0.000382796	0	0.00706597	0.000269386	0
		Intrón (region 3)	Control	0.000797246	8.80596e-05	5.95703e-06	0.00817346	0.000324667	0.000161719	0.000927436	1.64735e-05	1.91968e-05	0.0017032	0.000212265	0.00587793	0.00345086	0.000167324	0.000105345	0.00224544	0.000240568	0.00196636	0.000891943	9.13642e-05	0.000417568	0.00490046	0.000381858	0.00584594	0.000639089	6.21982e-05	3.67424e-05
			Infected	0.0176877	0.000920805		0.0415667	0.00116049		0.00672214	0.000425436		0.0102685	0.00125059	0	0.017273	0.00155165	0	0.0144861	0.00112853	0	0.00608285	0.000827808	0	0.0177954	0.00193318	0	0.00902223	0.00072263	0
		Exon 2 (3'-UTR)	Control	0.00041845	3.56037e-05	2.16943e-05	0.00465333	0.000326739	3.91259e-06	0.00064227	4.45483e-05	0.000116445	0.00157959	0.00020887	0.000134571	0.00261261	0.000160301	0.00223559	0.00346568	0.000113475	0.000142653	0.00498377	0.000189962	0.000432282	0.0185443	0.000706836	0.020206	0.00587379	0.000795524	2.71825e-06
			Infected	0.00850089	0.000122443		0.0176633	0.000428153		0.00695626	0.000729891		0.00410316	0.000218419	0	0.00750045	0.000544194	0	0.0281009	0.00300188	0	0.0184215	0.00216693	0	0.0331249	0.00389652	0	0.0800134	0.0014185	0

## Sheet: 6 miR1127-3p expression
			B. cinerea	P. syringae
			24 hpi	12 hpi	24 hpi	48 hpi
	Average	Control	1	1	1	1
		Infected	0.430642	0.740476	0.740654	1.7815
	Standad deviation	Control	0.0771065	0.163889	0.16503	0.354289
		Infected	0.00292798	0.168194	0.137771	0.0129349
	Significance		0.00597198	0.128183	0.107103	0.0619071

## Sheet: 7 SlyWRKY75 Processing primers
	Name	Sequence
		Forward	Reverse
	Fw1	TTTCCATCAGCATCATCGTCG
	Rev1		TTCCATGCTTGCCATTAGTCC
	Rev2		AAAATGTGCTCAAAGTTATCCGTAG

## Sheet: 8 Sly WRKY75 intron primers
	Region	Sequence
		Forward	Reverse
	miRNA binding	ATGGAGGAAATATGGACAAAAAGC	GCCCAAATGACAAATAATTCCGG
	1	GGTTGTCAAGCAAAGAGGTGTT	TTGACTTGGATTAGAACCTAGAAGA
	2	CCAGCGAAATCGAGGACAC	CGATGGAAATGAGATGGGAAAC
	3	ATCTATATTTATCCCCACATACTACCAA	TCTAAACCACTAGCCCTACCCA
